# Supplementary material for: Insensitivity of alkenone carbon isotopes to atmospheric CO 2 at low to moderate CO 2 levels
Source: Copernicus journal article supplement (doi:10.5194/cp-15-539-2019), 2019-03-27
Supplement: Supplementary file 1 [file Data Table_Alkenone_CO2.xlsx]

## Sheet: Alkenone CO2
Leg/Exp	Site	H	Cor	T	Sc	Half	Top(cm)	Bot(cm)	Depth(mbsf)	Age (Ma)	δ13CGs.ruber	SST (UK37' Muller et al 1998)	δ13C37:2	S	[PO3-4]	εf	b	SST (K)	ε(Calcite->CO2(aq))	ε(CO2(aq)-CO2(g))	KH	δ13Cbiomass	δ13CCO2(g)	δ13CCO2(q)	εp	Ce	pCO2 (uatm)	pCO2-corrected (-21uatm; uatm)
165	999	A	1	H	4	W	1	3	4.51	0.111324	1.428	26.6035	-23.5747	35	0.2	25	104.802	299.753	8.78759	-1.05436	0.0272821	-19.4564	-7.29548	-8.34214	11.3348	7.66925	281.109	260.109
165	999	A	1	H	4	W	32	34	4.82	0.119056	1.028	26.5862	-24.4173	35	0.2	25	104.802	299.736	8.78965	-1.05443	0.0272936	-20.3026	-7.69402	-8.74034	11.8019	7.94067	290.935	269.935
165	999	A	1	H	4	W	51	53	5.01	0.123775	1.31656	27.8683	-23.8245	35	0.2	25	104.802	301.018	8.6358	-1.04913	0.0264598	-19.7073	-7.25658	-8.29809	11.6385	7.84361	296.435	275.435
165	999	A	1	H	4	W	62	64	5.12	0.127485	1.133	28.21	-24.2377	35	0.2	25	104.802	301.36	8.5948	-1.04772	0.0262452	-20.1222	-7.39821	-8.43819	11.9239	8.01479	305.381	284.381
165	999	A	1	H	4	W	76	78	5.26	0.131908	0.914513	26.9533	-23.754	35	0.2	25	104.802	300.103	8.7456	-1.05291	0.0270501	-19.6365	-7.76319	-8.80792	11.0454	7.51024	277.642	256.642
165	999	A	1	H	4	W	81	83	5.31	0.133215	1.092	28.3656	-24.5237	35	0.2	25	104.802	301.516	8.57613	-1.04708	0.0261485	-20.4094	-7.42049	-8.4598	12.1986	8.18673	313.085	292.085
165	999	A	1	H	4	W	90	92	5.4	0.135568	1.04	25.7872	-23.8087	35	0.2	25	104.802	298.937	8.88554	-1.05775	0.0278373	-19.6914	-7.77644	-8.82597	11.0837	7.53086	270.531	249.531
165	999	A	1	H	4	W	103	105	5.53	0.138967	0.888588	26.5561	-23.792	35	0.2	25	104.802	299.706	8.79326	-1.05455	0.0273137	-19.6746	-7.83577	-8.88206	11.0092	7.49076	274.249	253.249
165	999	A	1	H	4	W	132	134	5.82	0.146695	1.34	26.0276	-23.2865	35	0.2	25	104.802	299.178	8.85669	-1.05675	0.0276717	-19.167	-7.4507	-8.49958	10.8759	7.42007	268.146	247.146
165	999	A	1	H	4	W	142	144	5.92	0.150038	1.227	25.7261	-23.8325	35	0.2	25	104.802	298.876	8.89287	-1.05801	0.0278796	-19.7153	-7.59829	-8.64826	11.2896	7.64399	274.178	253.178
165	999	A	1	H	5	W	51	53	6.51	0.169762	0.780181	26.2469	-23.8695	35	0.2	25	104.802	299.397	8.83037	-1.05584	0.0275222	-19.7525	-7.97973	-9.02714	10.9414	7.45467	270.861	249.861
165	999	A	1	H	5	W	91	93	6.91	0.179935	0.532228	26.1987	-23.656	35	0.2	25	104.802	299.349	8.83616	-1.05604	0.0275549	-19.5381	-8.2312	-9.27854	10.464	7.20981	261.652	240.652
165	999	A	1	H	6	W	12	14	7.12	0.184372	0.935314	24.0985	-23.6015	35	0.2	25	104.802	297.248	9.08818	-1.06484	0.0290511	-19.4833	-8.07944	-9.13568	10.5533	7.25437	249.711	228.711
165	999	A	1	H	6	W	33	35	7.33	0.190009	1.32388	26.4259	-23.6068	35	0.2	25	104.802	299.576	8.80889	-1.05509	0.0274011	-19.4887	-7.41965	-8.46692	11.2408	7.61687	277.976	256.976
165	999	A	1	H	6	W	39	41	7.39	0.191677	1.569	27.0758	-23.638	35	0.2	25	104.802	300.226	8.7309	-1.0524	0.0269697	-19.52	-7.09991	-8.14484	11.6016	7.82199	290.029	269.029
165	999	A	1	H	CC	W	7	9	7.62	0.198069	1.5307	26.8635	-23.6057	35	0.2	25	104.802	300.014	8.75638	-1.05328	0.0271093	-19.4875	-7.16295	-8.20869	11.503	7.76483	286.427	265.427
165	999	A	2	H	1	W	39	40	7.99	0.211566	0.808658	27.8807	-24.0917	35	0.2	25	104.802	301.031	8.63432	-1.04908	0.0264519	-19.9756	-7.75867	-8.79961	11.4038	7.70816	291.402	270.402
165	999	A	2	H	1	W	59	61	8.19	0.220436	0.558425	26.2959	-23.935	35	0.2	25	104.802	299.446	8.82449	-1.05563	0.027489	-19.8182	-8.19376	-9.24075	10.7914	7.37593	268.323	247.323
165	999	A	2	H	1	W	69	71	8.29	0.223658	1.384	26.3236	-23.7433	35	0.2	25	104.802	299.474	8.82117	-1.05552	0.0274702	-19.6258	-7.37214	-8.41988	11.4302	7.72318	281.147	260.147
165	999	A	2	H	1	W	91	93	8.51	0.227098	1.19706	26.5511	-23.705	35	0.2	25	104.802	299.701	8.79387	-1.05457	0.0273171	-19.5873	-7.53058	-8.57722	11.23	7.6109	278.613	257.613
165	999	A	2	H	1	W	111	113	8.71	0.235763	1.459	27.4608	-24.066	35	0.2	25	104.802	300.611	8.68471	-1.05081	0.0267198	-19.9498	-7.16349	-8.20677	11.9821	8.05058	301.297	280.297
165	999	A	2	H	1	W	123	125	8.83	0.239483	1.569	27.1022	-23.52	35	0.2	25	104.802	300.252	8.72773	-1.05229	0.0269524	-19.4015	-7.09679	-8.14161	11.4827	7.75315	287.661	266.661
165	999	A	2	H	2	W	9	11	9.19	0.247179	1.03101	27.2139	-23.2317	35	0.2	25	104.802	300.364	8.71434	-1.05183	0.0268796	-19.1119	-7.61695	-8.66076	10.6548	7.30572	271.794	250.794
165	999	A	2	H	2	W	23	24	9.33	0.250066	1.028	25.7065	-23.3723	35	0.2	25	104.802	298.856	8.89522	-1.05809	0.0278933	-19.2532	-7.79786	-8.8477	10.6098	7.28286	261.097	240.097
165	999	A	2	H	2	W	63	65	9.73	0.257842	0.872542	26.664	-23.454	35	0.2	25	104.802	299.814	8.78032	-1.0541	0.0272417	-19.3352	-7.83895	-8.88479	10.6565	7.30656	268.213	247.213
165	999	A	10	H	1	W	107	109	84.67	2.5995	0.985	27.8805	-23.3365	35	0.2	25	104.8	301.031	8.63433	-1.04908	0.026452	-19.2172	-7.58385	-8.62497	10.7998	7.38031	279.007	258.007
165	999	A	10	H	1	W	137	139	84.97	2.60754	1.4734	27.3004	-22.248	35	0.2	25	104.8	300.45	8.70395	-1.05147	0.0268234	-18.1241	-7.16816	-8.21209	10.095	7.03133	262.134	241.134
165	999	A	10	H	2	W	20.5	22.5	85.305	2.61732	1.566	27.2465	-22.652	35	0.2	25	104.8	300.396	8.71042	-1.05169	0.0268584	-18.5298	-7.08273	-8.12697	10.5993	7.27754	270.96	249.96
165	999	A	10	H	2	W	50	52	85.6	2.62702	1.3854	27.7345	-22.0535	35	0.2	25	104.8	300.884	8.65187	-1.04968	0.0265447	-17.9288	-7.20414	-8.24625	9.85931	6.92188	260.764	239.764
165	999	A	10	H	2	W	70	72	85.8	2.63361	1.5181	27.1134	-22.382	35	0.2	25	104.8	300.263	8.72639	-1.05224	0.0269451	-18.2587	-7.14593	-8.19066	10.2553	7.10776	263.787	242.787
165	999	A	10	H	2	W	96	98	86.06	2.64229	1.4092	26.842	-21.816	35	0.2	25	104.8	299.992	8.75896	-1.05337	0.0271235	-17.6903	-7.28595	-8.33164	9.5272	6.77331	249.721	228.721
165	999	A	10	H	2	W	121	123	86.31	2.65061	1.2063	27.4503	-23.6425	35	0.2	25	104.8	300.6	8.68597	-1.05085	0.0267266	-19.5245	-7.41526	-8.45832	11.2865	7.64228	285.943	264.943
165	999	A	10	H	2	W	140	142	86.5	2.65685	1.2677	27.1962	-23.315	35	0.2	25	104.8	300.346	8.71645	-1.0519	0.0268911	-19.1956	-7.38439	-8.42852	10.9778	7.47402	277.937	256.937
165	999	A	10	H	3	W	19	21	86.79	2.66622	1.4246	27.7476	-22.248	35	0.2	25	104.8	300.898	8.65029	-1.04962	0.0265363	-18.1241	-7.16372	-8.20583	10.1014	7.03434	265.083	244.083
165	999	A	10	H	3	W	50	52	87.1	2.67518	1.5257	27.7972	-21.679	35	0.2	25	104.8	300.947	8.64433	-1.04942	0.0265048	-17.5527	-7.05762	-8.09964	9.62198	6.81505	257.125	236.125
165	999	A	10	H	3	W	77	79	87.37	2.68212	1.4264	27.6385	-22.204	35	0.2	25	104.8	300.788	8.66338	-1.05007	0.0266058	-18.0799	-7.17482	-8.21736	10.0442	7.00744	263.38	242.38
165	999	A	10	H	3	W	100	102	87.6	2.68822	1.2319	27.3273	-24.137	35	0.2	25	104.8	300.477	8.70072	-1.05136	0.0268059	-20.0211	-7.4044	-8.44797	11.8096	7.9453	296.401	275.401
165	999	A	10	H	3	W	120	122	87.8	2.69349	1.2111	28.1362	-24.061	35	0.2	25	104.8	301.286	8.60366	-1.04803	0.0262913	-19.9448	-7.3295	-8.36985	11.8105	7.94585	302.224	281.224
165	999	A	10	H	3	W	140	142	88	2.69876	1.5351	27.6208	-23.7145	35	0.2	25	104.8	300.771	8.6655	-1.05015	0.0266171	-19.5968	-7.06915	-8.11187	11.7145	7.88845	296.367	275.367
165	999	A	10	H	4	W	14	16	88.24	2.70487	1.5569	27.056	-23.2328	35	0.2	25	104.8	300.206	8.73328	-1.05248	0.0269827	-19.113	-7.11425	-8.15924	11.1672	7.57635	280.786	259.786
165	999	A	10	H	4	W	29	31	88.39	2.70903	1.0137	26.6774	-22.2355	35	0.2	25	104.8	299.827	8.77872	-1.05405	0.0272328	-18.1116	-7.69744	-8.74338	9.54099	6.77935	248.941	227.941
165	999	A	10	H	4	W	49	51	88.59	2.7143	0.9842	26.0797	-23.5433	35	0.2	25	104.8	299.23	8.85043	-1.05653	0.027636	-19.4249	-7.79723	-8.84552	10.789	7.3747	266.851	245.851
165	999	A	10	H	4	W	148	150	89.58	2.74186	1.5478	28.3352	-22.8785	35	0.2	25	104.8	301.485	8.57978	-1.04721	0.0261674	-18.7573	-6.97216	-8.01206	10.9506	7.45955	285.07	264.07
165	999	A	10	H	5	W	29	31	89.89	2.75226	1.2925	27.8409	-22.6885	35	0.2	25	104.8	300.991	8.63909	-1.04924	0.0264771	-18.5665	-7.28366	-8.32526	10.435	7.19545	271.761	250.761
165	999	A	10	H	5	W	71	73	90.31	2.76614	1.4354	27.7421	-22.4595	35	0.2	25	104.8	300.892	8.65095	-1.04965	0.0265398	-18.3365	-7.15366	-8.1958	10.3301	7.14403	269.182	248.182
165	999	A	10	H	5	W	120	122	90.8	2.78156	1.2553	27.5929	-23.6375	35	0.2	25	104.8	300.743	8.66886	-1.05026	0.026635	-19.5195	-7.34984	-8.39239	11.3486	7.67702	288.231	267.231
165	999	A	10	H	6	W	1	3	91.11	2.78961	1.2428	27.6039	-22.6575	35	0.2	25	104.8	300.754	8.66754	-1.05022	0.026628	-18.5353	-7.36094	-8.40342	10.3233	7.14069	268.165	247.165
