# Supplementary material for: Insensitivity of alkenone carbon isotopes to atmospheric CO 2 at low to moderate CO 2 levels
Source: Copernicus journal article supplement (doi:10.5194/cp-15-539-2019), 2019-03-27
Supplement: Supplementary file 2 [file Data Table_Boron_CO2.xlsx]

## Sheet: Boron CO2
	Site	H	Cor	T	Sc	Half	Top(cm)	Bot(cm)	Depth(mbsf)	Age (Ma)	S	Mg/Ca	SSTMg	δ11B	δ11B.er	δ11Bbor	pHruber	pCO2-ruber	CO2calc	lw95	up95
	999	A	1	H	4	W	1	3	4.51	0.111324	35	3.65109	25.14	20.376	0.110254	19.11	8.13783	304.115	283.115	244.455	325.782		alphaB	1.0272
	999	A	1	H	4	W	32	34	4.82	0.119056	35	4.10079	26.43	20.3087	0.135508	19.01	8.11337	324.96	303.96	262.007	350.867		TA	2300
	999	A	1	H	4	W	51	53	5.01	0.123775	35	4.59167	27.69	20.5522	0.0945848	19.38	8.13332	304.844	283.844	245.013	325.492		d11Bsw	39.6
	999	A	1	H	4	W	62	64	5.12	0.127485	35	4.78183	28.14	20.6696	0.112446	19.56	8.14421	294.43	273.43	235.976	313.992
	999	A	1	H	4	W	76	78	5.26	0.131908	35	4.66815	27.87	20.8849	0.109216	19.88	8.17633	267.893	246.893	210.496	284.625
	999	A	1	H	4	W	81	83	5.31	0.133215	35	4.26842	26.88	20.9233	0.109291	19.94	8.19229	256.325	235.325	201.685	272.12
	999	A	1	H	4	W	84	86	5.34	0.134	35	4.33798	27.06	21.2376	0.122103	20.42	8.23108	227.839	206.839	174.115	241.441
	999	A	1	H	4	W	90	92	5.4	0.135568	35	4.02942	26.24	21.1783	0.120425	20.33	8.23304	227.638	206.638	174.912	240.945
	999	A	1	H	4	W	103	105	5.53	0.138967	35	4.04033	26.27	21.1893	0.111313	20.34	8.23382	226.837	205.837	174.23	239.884
	999	A	1	H	4	W	132	134	5.82	0.146695	35	4.11102	26.46	21.1148	0.115057	20.23	8.2222	234.742	213.742	181.365	248.959
	999	A	1	H	4	W	142	144	5.92	0.150038	35	4.19218	26.68	21.2153	0.11048	20.38	8.23252	227.176	206.176	174.2	240.044
	999	A	1	H	5	W	51	53	6.51	0.169762	35	4.21063	26.72	21.22	0.111478	20.39	8.23292	226.878	205.878	173.341	240.152
	999	A	1	H	5	W	91	93	6.91	0.179935	35	3.86726	25.78	21.1718	0.108374	20.32	8.23785	224.83	203.83	172.814	237.845
	999	A	1	H	6	W	12	14	7.12	0.184372	35	3.84094	25.7	21.0637	0.117346	20.15	8.2248	233.908	212.908	180.076	248.148
	999	A	1	H	6	W	33	35	7.33	0.190009	35	3.83613	25.69	20.9541	0.104606	19.99	8.2109	244.07	223.07	189.629	258.435
	999	A	1	H	6	W	39	41	7.39	0.191677	35	3.46533	24.56	20.8602	0.113155	19.84	8.21154	244.951	223.951	190.439	259.531
	999	A	1	H	CC	W	7	9	7.62	0.198069	35	3.25796	23.87	20.56	0.0992086	19.39	8.17937	270.582	249.582	213.978	287.217
	999	A	2	H	1	W	39	40	7.99	0.211566	35	3.50874	24.7	20.36	0.11502	19.08	8.14202	301.047	280.047	240.055	322.125
	999	A	2	H	1	W	59	61	8.19	0.220436	35	4.24319	26.81	20.6682	0.0969727	19.55	8.16023	282.437	261.437	225.738	301.036
	999	A	2	H	1	W	69	71	8.29	0.223658	35	4.18913	26.67	20.674	0.1338	19.56	8.16274	280.575	259.575	221.742	300.866
	999	A	2	H	1	W	91	93	8.51	0.227098	35	3.70727	25.31	20.8228	0.117785	19.79	8.19867	253.906	232.906	198.623	269.881
	999	A	2	H	1	W	111	113	8.71	0.235763	35	3.40871	24.38	20.4708	0.122253	19.25	8.16134	284.583	263.583	224.507	304.523
	999	A	2	H	1	W	123	125	8.83	0.239483	35	3.60232	24.99	20.6987	0.11003	19.6	8.18581	264.183	243.183	207.953	281.058
	999	A	2	H	1	W	139	141	8.99	0.2429	35	3.84376	25.71	20.4422	0.125495	19.21	8.14214	299.572	278.572	239.947	321.367
	999	A	2	H	2	W	9	11	9.19	0.247179	35	3.88581	25.83	20.5874	0.108126	19.43	8.16055	283.251	262.251	226.543	301.714
	999	A	2	H	2	W	23	24	9.33	0.250066	35	4.07297	26.36	21.0014	0.108559	20.06	8.21001	243.839	222.839	189.719	258.41
	999	A	2	H	2	W	63	65	9.73	0.257842	35	3.78793	25.55	20.843	0.0988278	19.82	8.19861	253.397	232.397	198.965	269.301
