# Supplementary material for: Insensitivity of alkenone carbon isotopes to atmospheric CO 2 at low to moderate CO 2 levels
Source: Copernicus journal article supplement (doi:10.5194/cp-15-539-2019), 2019-03-27
Supplement: Supplementary file 3 [file Data Table_Lith_Length.xlsx]

## Sheet: Lith Length
Site	999	999	999	999	999	999	999	999	999	999	999	999	999	999	999	999	999	999	999	999	999	999	999	999	999	999	999
H	A	A	A	A	A	A	A	A	A	A	A	A	A	A	A	A	A	A	A	A	A	A	A	A	A	A	A
Cor	1	1	1	1	1	1	1	1	1	1	1	1	1	1	1	1	1	2	2	2	2	2	2	2	2	2	2
T	H	H	H	H	H	H	H	H	H	H	H	H	H	H	H	H	H	H	H	H	H	H	H	H	H	H	H
Sc	4	4	4	4	4	4	4	4	4	4	4	5	5	6	6	6	CC	1	1	1	1	1	1	1	2	2	2
Half	W	W	W	W	W	W	W	W	W	W	W	W	W	W	W	W	W	W	W	W	W	W	W	W	W	W	W
Top(cm)	1	32	51	62	76	81	84	90	103	132	142	51	91	12	33	39	7	39	59	69	91	111	123	139	9	23	63
Bot(cm)	3	34	53	64	78	83	86	92	105	134	144	53	93	14	35	41	9	40	61	71	93	113	125	141	11	24	65
Depth(mbsf)	4.51	4.82	5.01	5.12	5.26	5.31	5.34	5.4	5.53	5.82	5.92	6.51	6.91	7.12	7.33	7.39	7.62	7.99	8.19	8.29	8.51	8.71	8.83	8.99	9.19	9.33	9.73
Age (Ma)	0.111324	0.119056	0.123775	0.127485	0.131908	0.133215	0.134	0.135568	0.138967	0.146695	0.150038	0.169762	0.179935	0.184372	0.190009	0.191677	0.198069	0.211566	0.220436	0.223658	0.227098	0.235763	0.239483	0.242904	0.247179	0.250066	0.257842
Average (um)	2.28234	2.38414	2.25671	2.32685	2.13427	2.37095	2.51304	2.34999	2.27443	2.11346	2.27737	2.19911	2.34147	2.53152	2.40697	2.18107	2.22101	2.39724	2.34596	2.42523	2.35195	2.51382	2.32147	2.44179	2.39651	2.39451	2.50686
Lith length (um)	1.42906	1.16359	1.24996	1.55069	1.18932	1.28605	1.3545	1.3545	1.29358	1.14456	1.37499	1.15481	1.60676	1.44435	1.35518	1.21051	1.10678	1.24996	1.22248	1.4891	1.45392	1.32011	1.247	1.30603	1.18426	1.32622	1.3545
	1.4835	1.17367	1.25163	1.58416	1.27884	1.35518	1.37499	1.45392	1.43713	1.37146	1.46105	1.3545	1.61579	1.73299	1.35978	1.22248	1.20342	1.32011	1.26923	1.52301	1.47913	1.42777	1.33109	1.37499	1.22569	1.462	1.51922
	1.52892	1.3545	1.32622	1.58532	1.35876	1.46768	1.42777	1.52301	1.591	1.37213	1.499	1.3696	1.63315	1.75749	1.46768	1.247	1.25163	1.35518	1.30159	1.5894	1.5096	1.43197	1.36656	1.46737	1.26923	1.5096	1.53962
	1.56522	1.35518	1.3545	1.61579	1.40542	1.499	1.42906	1.55232	1.60503	1.462	1.53013	1.45392	1.68922	1.77879	1.52301	1.27703	1.25972	1.36656	1.35518	1.60676	1.51922	1.44626	1.3755	1.48101	1.30301	1.57082	1.57303
	1.56522	1.36063	1.37213	1.62791	1.41394	1.5215	1.507	1.56522	1.60676	1.53841	1.60546	1.45947	1.68922	1.80715	1.53962	1.34697	1.32622	1.4242	1.46532	1.62776	1.591	1.57082	1.45392	1.5096	1.55069	1.58722	1.73299
	1.57082	1.43713	1.37499	1.62791	1.43471	1.5215	1.507	1.57318	1.64584	1.53962	1.61579	1.46595	1.7019	1.8092	1.5695	1.37129	1.37129	1.57082	1.48101	1.62791	1.60676	1.66094	1.507	1.52301	1.55069	1.60546	1.74799
	1.57082	1.45392	1.37499	1.63527	1.45392	1.52286	1.5096	1.60503	1.70285	1.61579	1.62791	1.46595	1.70339	1.81073	1.61579	1.37213	1.40542	1.60229	1.53013	1.65382	1.61865	1.8092	1.52301	1.53661	1.58532	1.60676	1.77007
	1.57303	1.46532	1.37751	1.67479	1.45392	1.53511	1.53962	1.60676	1.73339	1.61865	1.63527	1.56522	1.73672	1.84048	1.65424	1.4242	1.42777	1.60503	1.55232	1.66441	1.62634	1.82142	1.57082	1.53962	1.59463	1.65382	1.79496
	1.60503	1.4835	1.46532	1.68635	1.46737	1.53962	1.59303	1.68635	1.74997	1.62791	1.68333	1.59303	1.77879	1.84111	1.67479	1.46532	1.46768	1.61579	1.55708	1.75749	1.62791	1.8294	1.591	1.56522	1.59637	1.66441	1.806
	1.61865	1.51922	1.47913	1.68922	1.48739	1.53962	1.60848	1.68991	1.75959	1.65885	1.68922	1.59637	1.78812	1.87839	1.68635	1.499	1.47913	1.68635	1.5894	1.75749	1.65382	1.83847	1.60503	1.59637	1.61865	1.68922	1.806
	1.62336	1.51922	1.48521	1.7019	1.50193	1.53962	1.65424	1.71839	1.76352	1.65982	1.72496	1.59637	1.79496	1.88478	1.68922	1.5215	1.47913	1.69359	1.591	1.78954	1.68635	1.86158	1.60503	1.59637	1.7019	1.71367	1.81875
	1.62791	1.58532	1.507	1.70285	1.507	1.58109	1.71489	1.73339	1.78954	1.67327	1.8092	1.60503	1.806	1.89053	1.71367	1.53736	1.51922	1.69359	1.60503	1.806	1.68635	1.87062	1.62776	1.61579	1.7019	1.72496	1.84111
	1.65382	1.60503	1.52286	1.71489	1.51922	1.58532	1.74839	1.73672	1.79496	1.68333	1.8092	1.60503	1.82142	1.89053	1.72	1.57082	1.5215	1.70515	1.62776	1.81073	1.68991	1.87556	1.63527	1.61865	1.71839	1.74839	1.84111
	1.67341	1.60676	1.591	1.72496	1.52225	1.65382	1.75749	1.77007	1.79496	1.68635	1.8294	1.60848	1.82142	1.92362	1.7563	1.58722	1.53013	1.73672	1.64584	1.83255	1.70515	1.91108	1.63527	1.68333	1.72496	1.76352	1.84111
	1.70339	1.60848	1.59637	1.73672	1.55232	1.66441	1.77723	1.79496	1.8294	1.69359	1.86158	1.62634	1.82459	1.93081	1.7563	1.60503	1.53511	1.76771	1.67341	1.84111	1.71205	1.9135	1.66441	1.68991	1.72496	1.76771	1.86158
	1.71489	1.65382	1.60229	1.75959	1.60546	1.68635	1.77723	1.8275	1.8294	1.69359	1.86158	1.62791	1.8294	1.94418	1.77879	1.60503	1.53736	1.82459	1.70285	1.84111	1.71489	1.92362	1.67479	1.68991	1.73339	1.77007	1.86654
	1.71839	1.66608	1.60503	1.77723	1.6115	1.68922	1.82661	1.83066	1.87556	1.71205	1.92158	1.63315	1.84111	1.97344	1.77879	1.60503	1.53736	1.82459	1.70285	1.87556	1.72496	1.92806	1.68991	1.70339	1.74997	1.77879	1.87556
	1.7563	1.68635	1.60503	1.77879	1.62791	1.68922	1.84111	1.83255	1.87556	1.71489	1.93261	1.64584	1.87556	1.99302	1.78954	1.60676	1.53962	1.8294	1.71839	1.87556	1.73339	1.93261	1.70285	1.73299	1.78954	1.806	1.88478
	1.75749	1.68991	1.62791	1.78812	1.62791	1.68922	1.8576	1.83847	1.89639	1.71839	1.93261	1.65382	1.88478	2.00827	1.82142	1.62776	1.55069	1.83255	1.71839	1.92554	1.77007	1.93607	1.70719	1.75749	1.806	1.8092	1.88478
	1.75749	1.71489	1.62791	1.78812	1.64584	1.68922	1.87556	1.8576	1.90466	1.72885	1.93798	1.65424	1.88478	2.00884	1.8294	1.62776	1.57082	1.83255	1.72496	1.93381	1.77007	1.93953	1.75749	1.75749	1.8106	1.81073	1.94453
	1.75749	1.72496	1.65424	1.78812	1.65424	1.6985	1.92362	1.87556	1.91748	1.77007	1.93953	1.68922	1.92806	2.03343	1.85611	1.67479	1.57318	1.84111	1.73299	1.94049	1.77723	1.94809	1.75749	1.77007	1.82459	1.81875	1.94453
	1.77723	1.73339	1.66608	1.78954	1.67327	1.7019	1.92506	1.88245	1.91784	1.77294	1.97344	1.68991	1.93798	2.03343	1.87556	1.68333	1.57318	1.8576	1.73339	1.94525	1.78812	1.98698	1.77879	1.8092	1.8294	1.8294	1.9494
	1.78812	1.73672	1.68922	1.806	1.68333	1.70339	1.92554	1.88478	1.92362	1.77723	1.97636	1.6985	1.94418	2.04533	1.92158	1.68635	1.58532	1.86667	1.76313	1.9494	1.79496	2.00884	1.80459	1.8106	1.85698	1.83847	1.98698
	1.78812	1.75749	1.6985	1.80715	1.68922	1.71839	1.95697	1.89639	1.92506	1.77879	1.98744	1.70339	1.98744	2.05378	1.93081	1.70285	1.5894	1.87062	1.77723	1.99302	1.79496	2.02386	1.8092	1.81073	1.86158	1.86158	1.99302
	1.79496	1.77879	1.7019	1.81875	1.68991	1.7563	1.97344	1.91555	1.92806	1.79496	2.00769	1.71367	1.99302	2.05378	1.93081	1.71839	1.5894	1.94418	1.8092	2.00458	1.8106	2.0299	1.83255	1.82142	1.86158	1.87062	2.00769
	1.8092	1.79496	1.70515	1.8294	1.7019	1.75959	1.97636	1.91748	1.93081	1.83847	2.03343	1.72885	1.99348	2.08284	1.94418	1.73299	1.59463	1.99302	1.8106	2.00884	1.82459	2.04883	1.8401	1.82142	1.86667	1.87556	2.00827
	1.8092	1.83255	1.71367	1.83255	1.70285	1.77879	1.98744	1.92158	1.93953	1.84048	2.04533	1.73299	2.01413	2.10711	1.94418	1.73672	1.60676	1.99348	1.83255	2.01413	1.82459	2.06948	1.85362	1.83847	1.87556	1.89053	2.02146
	1.81073	1.85362	1.71839	1.85362	1.72496	1.77879	2.00827	1.9393	1.94453	1.84111	2.06948	1.75749	2.05615	2.11587	1.95697	1.75749	1.61865	2.01917	1.83847	2.0202	1.8294	2.07316	1.86158	1.85362	1.87556	1.89053	2.03479
	1.87062	1.87556	1.73299	1.85574	1.75749	1.77879	2.01917	1.97344	1.94453	1.85362	2.08827	1.77879	2.07127	2.15	1.95697	1.75959	1.63315	2.0202	1.85959	2.02146	1.84111	2.08827	1.87556	1.86158	1.87839	1.89053	2.0425
	1.88245	1.91555	1.73672	1.85698	1.77294	1.80715	2.0202	1.97636	1.9494	1.85362	2.08949	1.77879	2.07227	2.15526	1.98744	1.76352	1.63527	2.02146	1.86158	2.02146	1.84111	2.09214	1.87556	1.91555	1.88478	1.897	2.06948
	1.9135	1.91555	1.74839	1.86158	1.77723	1.82142	2.02146	1.99302	1.95272	1.87556	2.09181	1.78812	2.08006	2.17193	1.98744	1.76352	1.63993	2.02146	1.86654	2.02146	1.8576	2.09214	1.87556	1.92362	1.88478	1.92158	2.07127
	1.9135	1.92362	1.75749	1.86158	1.81875	1.82459	2.05378	1.99313	1.96605	1.89053	2.09214	1.8092	2.08949	2.17405	1.99302	1.77007	1.64584	2.02146	1.88478	2.05615	1.87556	2.10711	1.88478	1.92362	1.92158	1.92158	2.07227
	1.91555	1.92362	1.78954	1.87556	1.83205	1.82661	2.06411	2.00458	1.97344	1.90466	2.09446	1.8294	2.08949	2.19195	1.99302	1.77723	1.66441	2.05615	1.9135	2.07316	1.87556	2.12404	1.89053	1.92506	1.94691	1.92158	2.08406
	1.91652	1.94049	1.79496	1.88478	1.83255	1.83255	2.06948	2.01917	1.97636	1.91784	2.11587	1.84048	2.08949	2.21617	1.99313	1.78657	1.66608	2.06948	1.91555	2.08284	1.92158	2.12807	1.92158	1.93261	1.94691	1.92362	2.08949
	1.91652	1.96605	1.8092	1.90769	1.83255	1.84048	2.07227	2.03343	1.97636	1.92158	2.12339	1.85959	2.10711	2.22148	1.99348	1.78954	1.67479	2.08006	1.91555	2.09214	1.92362	2.12893	1.92362	1.93381	1.99302	1.92422	2.12404
	1.92158	1.99302	1.8294	1.91555	1.84048	1.87556	2.09181	2.04533	1.98744	1.92362	2.13544	1.86654	2.11761	2.23476	2.00458	1.81073	1.68333	2.09446	1.92158	2.10711	1.92362	2.12893	1.92362	1.93798	2.02146	1.93798	2.14849
	1.92506	2.00458	1.8294	1.91555	1.84048	1.91555	2.09214	2.04657	2.00769	1.92554	2.13544	1.86667	2.12404	2.23476	2.01917	1.8294	1.68635	2.09799	1.92158	2.10711	1.93261	2.13544	1.92362	1.93798	2.02146	1.98744	2.15
	1.93261	2.01917	1.83066	1.91652	1.84111	1.91784	2.12404	2.06948	2.00884	1.92698	2.14849	1.88245	2.12404	2.25514	2.02146	1.83847	1.68991	2.10711	1.92158	2.11761	1.94453	2.13544	1.95697	1.9393	2.03479	1.98744	2.15269
	1.94418	2.03343	1.83457	1.93261	1.86158	1.92362	2.14849	2.10711	2.01413	1.93261	2.15	1.92362	2.12513	2.25514	2.02146	1.8401	1.6985	2.11587	1.92362	2.16072	1.94453	2.14494	1.96534	1.96534	2.04657	2.02146	2.16072
	1.95697	2.04533	1.8401	1.94418	1.86158	1.92506	2.16072	2.12404	2.01917	1.93798	2.15	1.92362	2.14494	2.2574	2.03343	1.84111	1.70285	2.11587	1.92806	2.16393	1.94453	2.16926	1.96605	1.96605	2.06948	2.04533	2.16072
	1.95697	2.05007	1.85698	1.96534	1.87062	1.92506	2.17246	2.13544	2.01917	1.93953	2.15526	1.92806	2.14849	2.2574	2.04533	1.84111	1.71839	2.12339	1.93798	2.16393	1.95697	2.17246	1.97636	1.97636	2.08006	2.07316	2.16072
	1.96169	2.06948	1.86158	1.97636	1.87839	1.93381	2.17246	2.13544	2.02146	1.9494	2.15965	1.93798	2.15269	2.2574	2.07227	1.85362	1.73299	2.12404	1.9494	2.16414	1.96605	2.17533	1.98744	1.97636	2.09181	2.08006	2.16297
	1.97344	2.07227	1.86667	2.01917	1.92158	1.97344	2.19469	2.14494	2.02146	1.95272	2.16393	1.93798	2.15269	2.25955	2.09181	1.85362	1.76313	2.13533	1.99302	2.19469	1.98744	2.1892	1.99348	1.99302	2.15269	2.08284	2.1969
	1.97344	2.08949	1.89053	2.01917	1.92362	1.98744	2.1969	2.15269	2.02146	1.97109	2.17246	1.9494	2.15269	2.26771	2.10711	1.87839	1.77007	2.13544	2.01917	2.1969	1.99302	2.21074	2.01917	2.01917	2.15569	2.10711	2.1969
	1.98698	2.08949	1.92506	2.0202	1.92506	2.02146	2.24106	2.15269	2.02146	1.97344	2.17246	1.96605	2.17246	2.26771	2.10711	1.91555	1.80715	2.15	2.08982	2.21356	2.00769	2.2146	2.03343	2.02386	2.16297	2.12513	2.1969
	1.98698	2.09214	1.92554	2.02146	1.93381	2.02751	2.2575	2.15569	2.02511	1.97344	2.17405	1.97344	2.17246	2.26771	2.12404	1.92158	1.8294	2.15526	2.10349	2.21356	2.01917	2.22699	2.05367	2.0425	2.16297	2.13544	2.21241
	1.98744	2.10272	1.93381	2.02146	1.93798	2.02888	2.2723	2.17246	2.03343	1.99302	2.17735	1.99302	2.17246	2.27474	2.14235	1.92362	1.84111	2.16072	2.12404	2.21617	2.02146	2.23321	2.06948	2.08949	2.16393	2.15	2.21241
	1.99302	2.13533	1.93798	2.02625	1.97636	2.03842	2.27474	2.19469	2.0425	1.99313	2.18296	1.99302	2.17405	2.29245	2.15	1.92362	1.84111	2.17246	2.16072	2.25001	2.04533	2.2575	2.07316	2.08949	2.17735	2.15	2.21356
	2.00884	2.15269	1.9494	2.0425	1.98744	2.05367	2.28396	2.1969	2.06948	1.99962	2.19469	1.99962	2.19469	2.32359	2.17193	1.92362	1.84111	2.17735	2.17246	2.25514	2.04657	2.28265	2.08949	2.09181	2.18593	2.16297	2.21617
	2.02146	2.17533	1.95697	2.07127	1.99302	2.07127	2.28841	2.21356	2.10711	2.00458	2.19469	2.00884	2.19469	2.32846	2.17246	1.93261	1.8576	2.19469	2.17246	2.2575	2.04657	2.28356	2.09181	2.09181	2.1969	2.16297	2.22148
	2.03343	2.19195	1.96605	2.07127	2.02146	2.07127	2.30201	2.22148	2.10711	2.06948	2.19469	2.01917	2.1969	2.33094	2.17246	1.935	1.86158	2.1969	2.19195	2.30221	2.09181	2.29336	2.10349	2.10349	2.1969	2.17533	2.22699
	2.04533	2.19469	1.97344	2.07316	2.0425	2.07316	2.30221	2.22699	2.13533	2.06948	2.1969	2.01917	2.22148	2.33193	2.17405	1.935	1.87556	2.22699	2.19195	2.33193	2.10711	2.33193	2.10711	2.10711	2.1969	2.17735	2.23321
	2.07227	2.22709	1.99302	2.08284	2.04533	2.07316	2.32329	2.24106	2.17735	2.07127	2.20037	2.01917	2.24106	2.34439	2.17735	1.94453	1.90466	2.23321	2.19195	2.33718	2.10711	2.33193	2.12339	2.15	2.20037	2.19195	2.28356
	2.07316	2.23321	2.00884	2.08949	2.04657	2.08949	2.32359	2.25514	2.18423	2.07227	2.21356	2.0324	2.25514	2.34439	2.19469	1.94453	1.91555	2.25514	2.19469	2.36197	2.11761	2.33886	2.12339	2.15269	2.23321	2.19469	2.30201
	2.09181	2.26006	2.00884	2.09181	2.04657	2.09446	2.36001	2.2575	2.19195	2.08949	2.24106	2.03842	2.2575	2.34656	2.19469	1.97344	1.91652	2.2575	2.25001	2.36197	2.13533	2.34892	2.13544	2.15526	2.24199	2.23321	2.33886
	2.09214	2.30201	2.02888	2.09181	2.05378	2.09876	2.37563	2.2788	2.19469	2.09688	2.24559	2.0425	2.2575	2.36001	2.21241	1.97344	1.92554	2.26006	2.2574	2.37446	2.14235	2.35383	2.14451	2.17246	2.2575	2.2788	2.34439
	2.10711	2.31262	2.04533	2.12339	2.05615	2.10711	2.38989	2.35383	2.19469	2.10711	2.25001	2.04533	2.27047	2.37475	2.22148	1.97636	1.93261	2.2788	2.2575	2.37475	2.19469	2.37563	2.15526	2.18296	2.2575	2.28396	2.36197
	2.12339	2.32568	2.04533	2.12404	2.07082	2.12404	2.41117	2.38194	2.21241	2.1349	2.25514	2.07127	2.2788	2.38059	2.22709	1.99313	1.96169	2.28508	2.32727	2.38485	2.22709	2.3768	2.17193	2.21241	2.26771	2.28841	2.39356
	2.15269	2.32568	2.08949	2.14849	2.10711	2.13533	2.42331	2.38989	2.22148	2.15	2.25514	2.07227	2.2788	2.39308	2.25094	2.02146	1.96605	2.33193	2.32727	2.39356	2.25094	2.39269	2.19195	2.23321	2.27047	2.29245	2.41385
	2.15387	2.33718	2.08949	2.16072	2.10711	2.13544	2.42522	2.40204	2.22709	2.15	2.2575	2.08949	2.30221	2.42522	2.29245	2.03343	2.03343	2.35177	2.32727	2.4081	2.2574	2.40685	2.19195	2.24559	2.279	2.32359	2.42331
	2.16072	2.38485	2.09688	2.16297	2.14451	2.13544	2.45081	2.42331	2.24199	2.15269	2.2575	2.11761	2.32568	2.45081	2.30201	2.0425	2.05378	2.35383	2.32727	2.42121	2.2575	2.40685	2.22148	2.32011	2.28356	2.32359	2.42883
	2.17246	2.39269	2.09688	2.1969	2.14494	2.16072	2.46304	2.45081	2.26118	2.17246	2.2575	2.14849	2.32846	2.47334	2.32359	2.04533	2.06948	2.35687	2.36852	2.42302	2.27474	2.42331	2.24106	2.32359	2.33094	2.33886	2.45081
	2.20142	2.39308	2.10711	2.21356	2.15526	2.17246	2.47922	2.45081	2.28396	2.19469	2.29245	2.16297	2.34439	2.47334	2.32727	2.09181	2.07227	2.365	2.39819	2.45081	2.28042	2.42522	2.2574	2.32568	2.33193	2.39308	2.48546
	2.22148	2.42331	2.11587	2.22148	2.16072	2.19195	2.51182	2.45712	2.28841	2.23321	2.29245	2.16297	2.37475	2.47922	2.33886	2.10349	2.08006	2.37475	2.40771	2.45081	2.30482	2.4333	2.26924	2.32727	2.365	2.39356	2.494
	2.23321	2.42883	2.11587	2.22699	2.18296	2.19469	2.51559	2.45712	2.30201	2.23476	2.29245	2.16393	2.37563	2.4822	2.37475	2.11761	2.08949	2.39356	2.45109	2.47334	2.36852	2.44883	2.26985	2.34439	2.3768	2.45081	2.49493
	2.26771	2.49733	2.15	2.26118	2.19195	2.24559	2.52879	2.46276	2.30221	2.25001	2.32727	2.23321	2.3768	2.48546	2.38989	2.13544	2.10711	2.40685	2.4725	2.47334	2.40819	2.45109	2.27474	2.36744	2.39819	2.45109	2.53454
	2.27474	2.55407	2.16393	2.26985	2.19469	2.2575	2.52879	2.46304	2.30482	2.25094	2.32846	2.25094	2.38892	2.50703	2.39356	2.15526	2.11587	2.45081	2.49437	2.48546	2.42522	2.46304	2.29245	2.39308	2.42302	2.50888	2.55163
	2.28153	2.57588	2.19195	2.2788	2.19469	2.31262	2.55163	2.48183	2.32727	2.2788	2.37436	2.2574	2.39308	2.52879	2.40771	2.16072	2.12339	2.45081	2.53454	2.50888	2.4314	2.46417	2.34034	2.43292	2.42302	2.5244	2.56869
	2.2876	2.59999	2.1969	2.28396	2.21241	2.34034	2.55886	2.48369	2.33193	2.28265	2.37446	2.25955	2.39308	2.53454	2.40896	2.17533	2.12807	2.47922	2.55163	2.52879	2.45081	2.47484	2.34034	2.47922	2.45109	2.55163	2.57183
	2.30201	2.63224	2.23486	2.28508	2.21356	2.34439	2.5721	2.48546	2.33193	2.28841	2.37475	2.26118	2.39356	2.57183	2.4314	2.17533	2.1349	2.48379	2.56932	2.53454	2.46454	2.4822	2.38485	2.48546	2.4822	2.57588	2.57588
	2.32727	2.69094	2.26006	2.33886	2.22242	2.34439	2.57471	2.49493	2.33718	2.34034	2.38485	2.28153	2.47334	2.57183	2.43292	2.18254	2.15269	2.49493	2.63224	2.57471	2.494	2.49632	2.39356	2.49493	2.50519	2.58036	2.59785
	2.32727	2.71036	2.26006	2.34034	2.25514	2.38485	2.61134	2.50325	2.34034	2.34034	2.38485	2.28841	2.48379	2.5721	2.4333	2.1969	2.15269	2.49632	2.65244	2.57901	2.51761	2.50888	2.40685	2.49493	2.5244	2.6015	2.6015
	2.32846	2.72041	2.26118	2.34439	2.2575	2.40685	2.61223	2.50519	2.34439	2.34656	2.38892	2.32359	2.4952	2.57901	2.43824	2.21356	2.16072	2.51182	2.68956	2.64039	2.55407	2.54573	2.47334	2.58716	2.55163	2.63224	2.6252
	2.33193	2.72813	2.28841	2.35383	2.2575	2.48546	2.64039	2.55886	2.38998	2.37563	2.42883	2.32359	2.51559	2.67362	2.47334	2.23321	2.17246	2.5411	2.69266	2.64039	2.57183	2.55262	2.47484	2.60372	2.58716	2.65645	2.65645
	2.36197	2.74409	2.28841	2.38989	2.27474	2.57471	2.66366	2.59999	2.39308	2.39308	2.4314	2.39308	2.51917	2.68956	2.48546	2.23476	2.28396	2.5411	2.73996	2.66088	2.58903	2.59162	2.48853	2.68956	2.64459	2.65645	2.69094
	2.38689	2.8251	2.33193	2.40771	2.2788	2.58903	2.67362	2.61594	2.39308	2.39356	2.4314	2.39308	2.5411	2.72643	2.48853	2.25094	2.30221	2.5411	2.73996	2.66192	2.63267	2.6493	2.50325	2.72643	2.65113	2.67102	2.72134
	2.39269	2.85554	2.3768	2.47782	2.33886	2.69909	2.67466	2.6178	2.39356	2.40204	2.43292	2.42522	2.57471	2.74199	2.4952	2.2575	2.30221	2.5721	2.73996	2.66366	2.63539	2.65244	2.52879	2.75208	2.65244	2.68956	2.74199
	2.39308	2.8757	2.38998	2.4952	2.33886	2.73996	2.68552	2.63267	2.40685	2.40204	2.45109	2.42883	2.57471	2.74199	2.50325	2.26006	2.36353	2.57471	2.73996	2.7061	2.72041	2.66088	2.55407	3.10688	2.65984	2.7193	2.75477
	2.43017	2.95873	2.39269	2.51182	2.34439	2.83841	2.70763	2.64459	2.42331	2.40771	2.47922	2.4314	2.59999	2.75376	2.59999	2.32329	2.365	2.57901	2.80787	2.72041	2.72643	2.71036	2.58716	3.15494	2.69094	2.72474	2.87144
	2.4314	2.95936	2.39356	2.53454	2.35383	2.87819	2.72134	2.65645	2.4333	2.4333	2.47922	2.47334	2.62415	2.79152	2.63267	2.35383	2.40204	2.6178	2.81001	2.81855	2.73895	2.78838	2.59162	3.45849	2.72643	2.74199	2.87819
	2.45712	2.9799	2.51559	2.5411	2.37563	2.89931	2.72643	2.71036	2.47334	2.45609	2.50177	2.58152	2.71207	2.7988	2.63267	2.35383	2.42522	2.62141	2.8165	2.87819	2.74072	2.78838	2.59785	3.53837	2.73895	2.80787	2.89101
	2.53454	2.98223	2.60008	2.61134	2.43824	2.92123	2.86822	2.72542	2.4822	2.50177	2.5051	2.58152	2.71352	2.84004	2.63267	2.37436	2.63118	2.69909	2.83808	2.88341	2.77883	2.87144	2.6252	3.54333	2.73996	2.8251	2.91172
	2.6178	2.99476	2.78838	2.63118	2.49733	2.95498	2.96552	2.74072	2.51917	2.53846	2.55163	2.59785	2.72643	2.89101	2.67362	2.37563	3.36398	2.71036	2.89093	2.89133	2.79872	2.90783	2.64459	3.60309	2.81855	2.85246	2.9455
	2.63267	3.09368	2.79798	2.65244	2.52879	3.04944	3.03828	2.74637	2.55407	2.57471	2.56644	2.62415	2.75376	2.91172	2.68552	2.39308	3.52705	2.75376	2.93063	2.9389	2.88493	2.97579	2.65244	3.65405	2.838	2.95075	2.96552
	2.75477	3.27993	2.9799	2.81584	2.59999	3.08942	3.11401	2.79086	2.57471	2.57471	2.58716	2.63224	2.76607	2.95936	2.68956	2.40685	3.58895	2.76181	2.96552	2.94676	3.02997	3.21006	2.71752	3.75266	2.8724	2.999	2.96552
	2.84231	3.2928	3.00585	2.95936	2.60372	3.28437	3.23073	2.82338	2.61037	2.59785	2.59785	2.65244	2.76758	2.95936	2.72542	2.45081	3.59976	2.84784	2.98417	3.03028	3.08021	3.36398	2.77408	3.77721	3.01744	3.0589	2.98417
	2.87819	3.2928	3.07923	3.19259	2.69266	3.30744	3.23073	2.85035	2.64599	2.59999	2.6047	2.7142	2.78838	3.04603	3.11401	2.5411	3.61897	2.96552	2.99283	3.04944	3.10688	3.46677	2.79798	3.84153	3.07833	3.07833	3.16693
	2.94738	3.33998	3.1962	3.34462	2.69266	3.43489	3.29799	2.85554	2.69909	2.64039	2.62415	2.72041	2.81354	3.05822	3.12956	2.58903	3.7714	3.04944	3.1175	3.06215	3.14121	3.46744	2.90783	3.84994	3.1962	3.11089	3.18461
	2.98417	3.37495	3.27655	3.36398	2.72542	3.63274	3.52423	2.90186	2.74199	2.64039	2.80787	2.73996	2.8251	3.14121	3.19743	2.70763	3.84634	3.09727	3.15494	3.25908	3.30751	3.74254	3.58303	3.85762	3.42147	3.11401	3.268
	3.34662	3.44443	3.84874	3.39945	2.73075	3.80556	3.53032	2.99283	2.80787	2.65244	2.82175	2.74637	2.9782	3.29904	3.28507	3.44269	4.05142	3.28507	3.17924	3.37844	3.67908	3.77078	3.61865	3.89649	3.60957	3.45849	3.27372
	3.55745	3.47915	3.89666	3.45849	2.83156	4.22785	3.60386	3.01744	2.81354	2.66192	2.84402	2.8349	3.04944	3.44269	3.29427	3.99836	4.11094	3.28838	3.74717	3.39435	3.7111	3.8212	3.9474	3.94535	4.04291	3.62305	3.64011
	3.62643	3.65329	4.07038	3.5488	2.88493	4.28864	3.75266	3.05027	2.85554	2.67466	2.95772	3.385	3.053	3.67323	4.13477	4.00322	4.11684	3.58438	3.85738	3.45508	3.82247	4.09946	4.04291	4.01106	4.27088	3.81708	3.95302
	3.69112	3.7111	4.19801	4.02021	2.97579	4.39952	3.97866	3.14165	2.89093	2.68956	3.04436	3.89441	3.07923	4.06492	4.24945	4.01354	4.15623	4.22025	3.91377	3.53346	3.96376	4.171	4.1151	4.04549	4.37402	3.89441	4.21751
	3.82464	3.84994	4.26226	4.20153	3.04944	4.71914	4.47221	3.15823	3.2928	2.71113	3.29799	3.92297	3.49658	4.15768	4.3	4.2296	4.16867	4.36455	3.92986	3.65709	3.9953	4.3065	4.20153	4.07537	4.41274	4.01106	4.24515
	4.39379	3.87489	4.31256	4.27769	3.15662	4.84633	4.63987	3.74254	3.7111	2.73996	3.36391	3.94248	3.61973	4.41253	4.41253	4.53222	4.3774	4.5548	3.96464	3.89886	4.22785	4.40975	4.24771	4.19388	4.42947	4.06526	4.27596
	4.47717	4.18284	4.44281	4.30134	3.39271	4.88069	4.72868	4.01538	3.98963	2.84231	3.39435	4.19448	3.67908	4.52625	4.87823	4.60903	4.47717	4.7344	4.18847	3.99287	4.35692	4.5849	4.26763	4.48423	4.50952	4.16834	4.58596
	4.51628	4.28891	5.21511	4.60145	4.16867	4.94486	4.96543	4.03834	4.16557	2.87337	3.50615	4.30134	3.90951	4.56732	5.10814	4.85776	4.64783	4.76044	4.2614	4.0816	4.48794	4.8628	4.60572	4.56175	4.5548	4.46087	4.8124
	4.72345	4.44281	5.45109	4.71914	4.27769	4.96296	5.4643	4.36937	4.6233	2.87369	3.84844	4.49617	3.92338	4.6267	5.24397	4.87823	4.97092	4.76166	4.26373	4.13902	4.6233	4.8666	4.82492	4.58596	4.57794	4.67085	5.20504
	4.90747	4.77189	5.58061	5.2736	5.52353	5.27802	6.25831	4.59723	4.79951	2.89253	3.9953	4.69469	3.93826	5.45189	5.81447	4.89615	5.14789	5.02019	4.515	4.36831	4.66728	4.93883	4.859	4.73474	4.6175	4.74352	5.40579
	5.7707	5.52332	5.60919	5.93139	5.56468	5.36713	6.90127	5.45287	5.45032	4.48423	4.00443	5.1403	4.79484	5.87485	6.06822	5.45355	5.20504	5.10814	4.85976	4.78176	5.07332	5.41668	5.59463	4.80649	5.09663	5.26254	5.60363
