# Supplementary material for: Insensitivity of alkenone carbon isotopes to atmospheric CO 2 at low to moderate CO 2 levels
Source: Copernicus journal article supplement (doi:10.5194/cp-15-539-2019), 2019-03-27
Supplement: Supplementary file [file cp-15-539-2019-supplement-title-page.pdf › cp-15-539-2019-supplement-title-page.pdf]

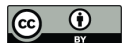

## *Supplement of*

# **Insensitivity of alkenone carbon isotopes to atmospheric CO<sub>2</sub> at low to moderate CO<sub>2</sub> levels**

**Marcus P. S. Badger et al.**

*Correspondence to:* Marcus P. S. Badger ([marcus.badger@open.ac.uk](mailto:marcus.badger@open.ac.uk))

- [cp-15-539-2019-supplement-title-page.pdf](#)
- [Data Table\\_Alkenone\\_CO2.xlsx](#)
- [Data Table\\_Boron\\_CO2.xlsx](#)
- [Data Table\\_Lith\\_Length.xlsx](#)

The copyright of individual parts of the supplement might differ from the CC BY 4.0 License.
